# Supplementary material for: Supramolecular Self-Healing Sensor Fiber Composites for Damage Detection in Piezoresistive Electronic Skin for Soft Robots
Source: MDPI journal article supplement (doi:10.3390/polym13172983), 2021-09-02
Supplement: s1 [file s1]

## Supplementary Figures

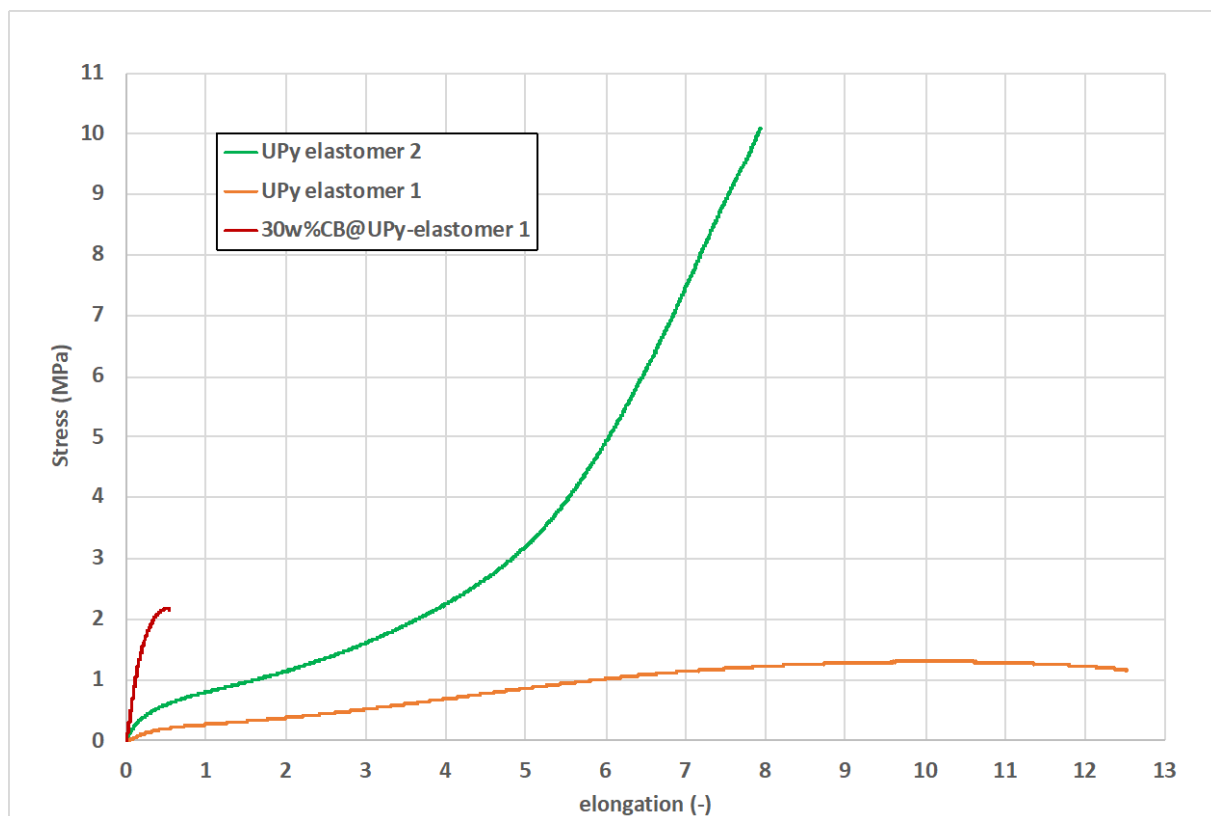

**Figure S1.** Tensile curves for the UPy elastomer 1, UPy elastomer 2 and the composite of UPy elastomer 1 with 30 wt.% carbon black.

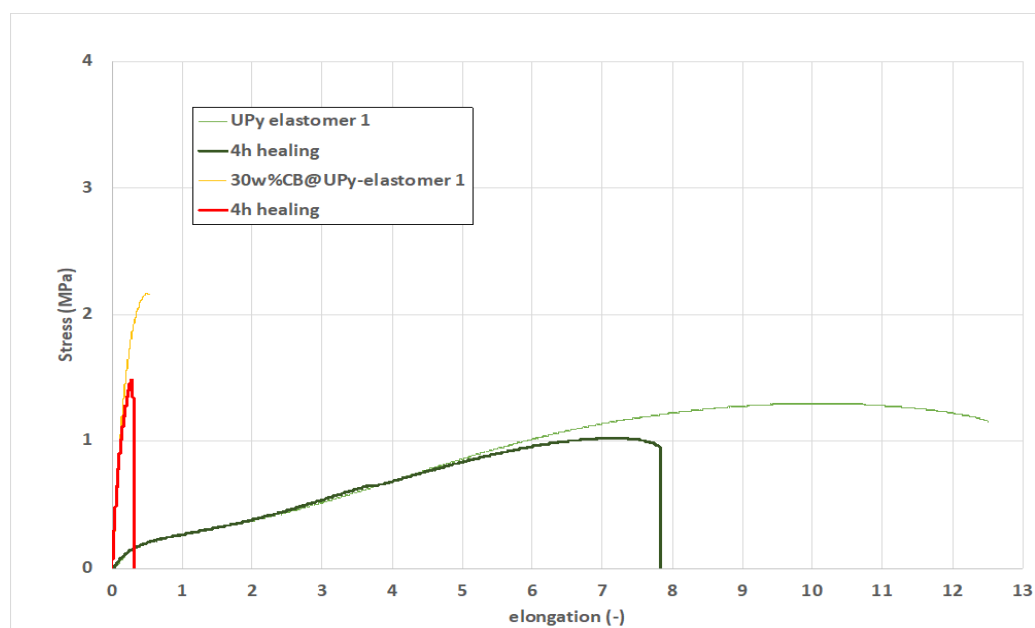

**Figure S2.** Stress-elongation curve up to the point of fracture for the elastomer UPy-1 and the composite UPy-1 with 30% carbon black before damage and 4 hours after healing.
